# Supplementary material for: Towards a comprehensive phylogeny of the large temperate genus Pedicularis (Orobanchaceae), with an emphasis on species from the Himalaya-Hengduan Mountains
Source: PubMed Central journal article supplement (PMC4498522; doi:10.1186/s12870-015-0547-9), 2015-07-11

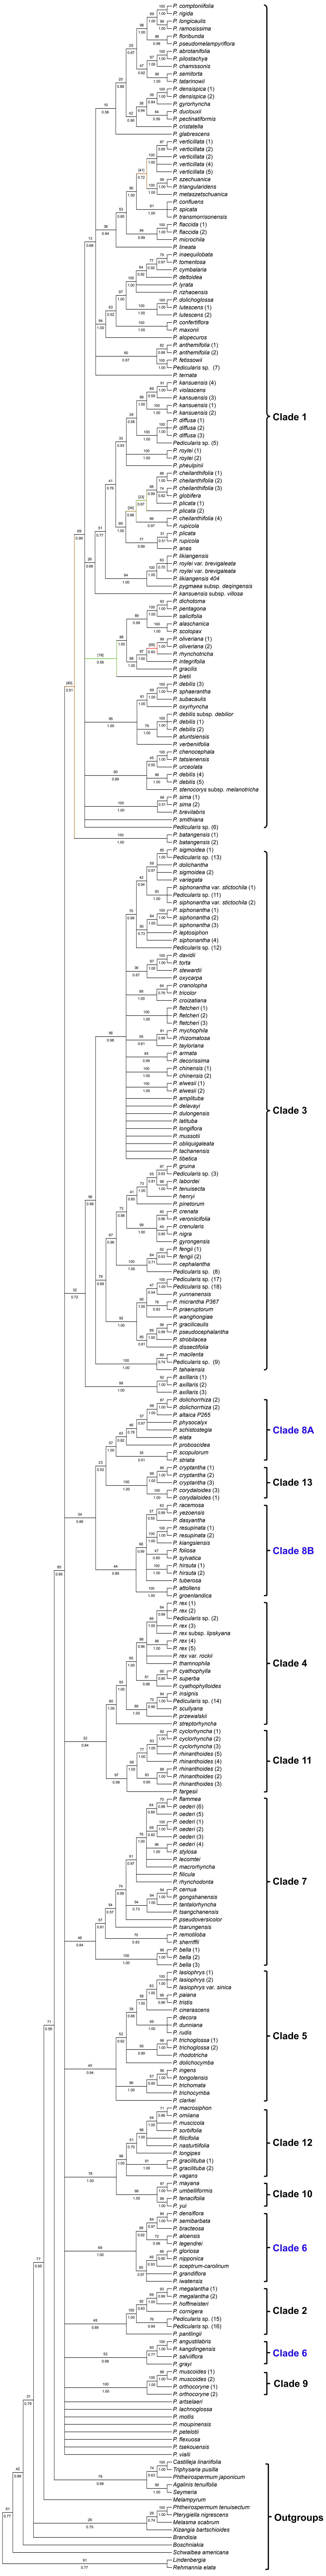

Supplement: 12870_2015_547_MOESM2_ESM.pdf [file 12870_2015_547_MOESM2_ESM.pdf]
